# Supplementary material for: Interfacial interaction of Ag nanoparticles with graphene oxide supports for improving NH3 and NO adsorption: a first-principles study
Source: Royal Society of Chemistry journal article supplement (doi:10.1039/c5cp07399e), 2016-01-01
Supplement: c5cp07399e1.pdf [file c5cp07399e1.pdf]

Interfacial Interaction of Ag Nanoparticles with Graphene Oxide  
supports for Improving NH<sub>3</sub> and NO Adsorption: a First-Principles  
Study

**Supporting Information**

Shaobin Tang,<sup>\*,†</sup> Weihua Wu,<sup>†</sup> and Jianping Yu<sup>\*,‡</sup>

<sup>†</sup>Key Laboratory of Organo-Pharmaceutical Chemistry of Jiangxi Province, Gannan Normal University, Ganzhou 341000, China

<sup>‡</sup>School of life and environmental sciences, Gannan Normal University, Ganzhou 341000, China

*\*E-mail address:* [tsb1980@xmu.edu.cn](mailto:tsb1980@xmu.edu.cn), [yujianping402871@sina.com](mailto:yujianping402871@sina.com)

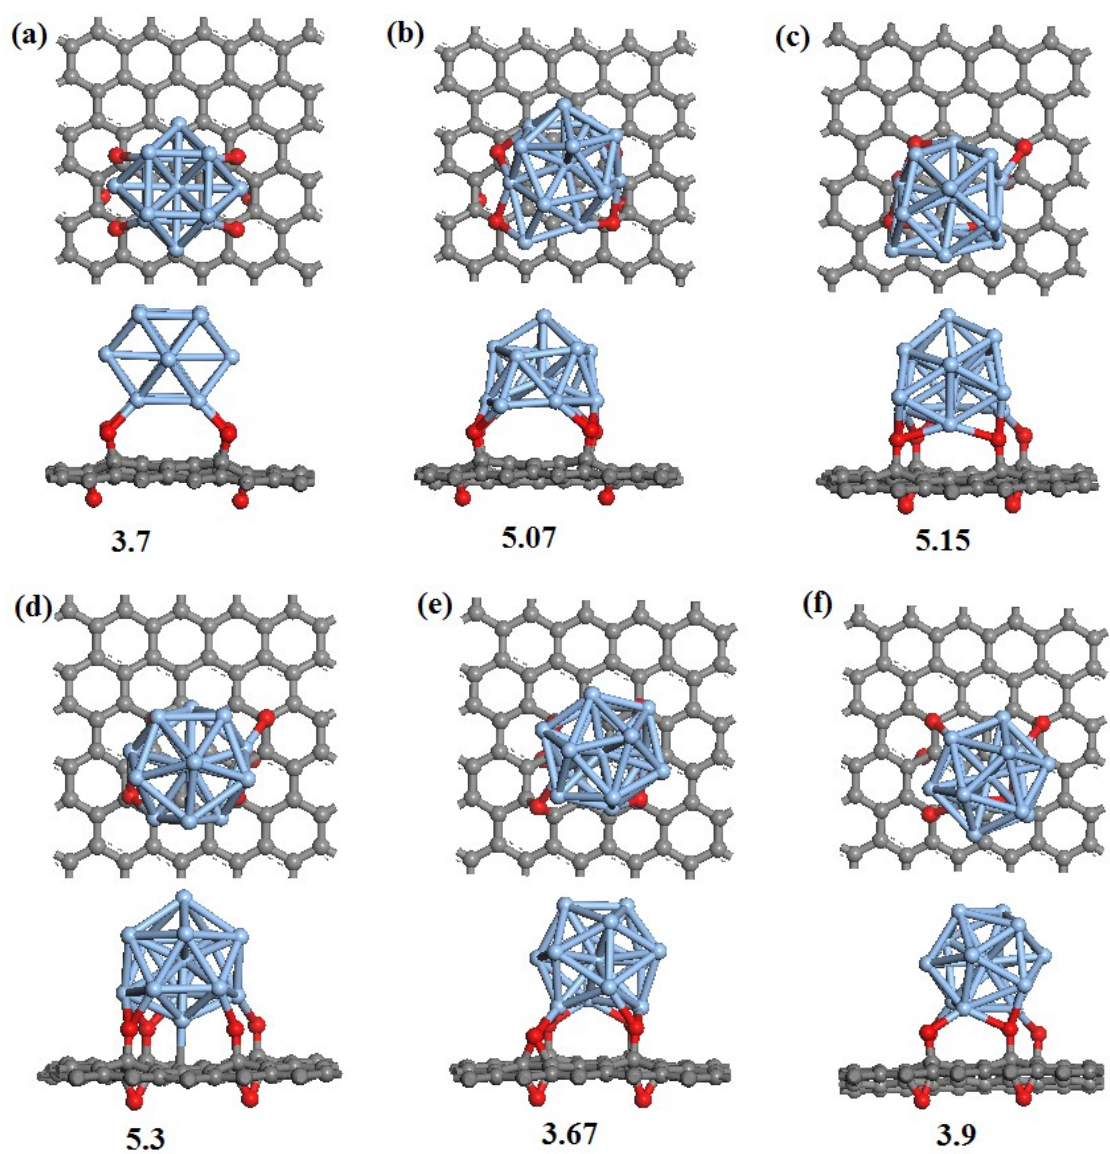

Figure S1. Top and side views of optimized structures and corresponding binding energies (in eV) for  $\text{Ag}_{13}$ /GOs with different direction of NPs relative to graphene surface:  $\text{Ag}_{13}$  with initial (a)-(c) cuboctahedron and (d)-(f) icosahedron structures.

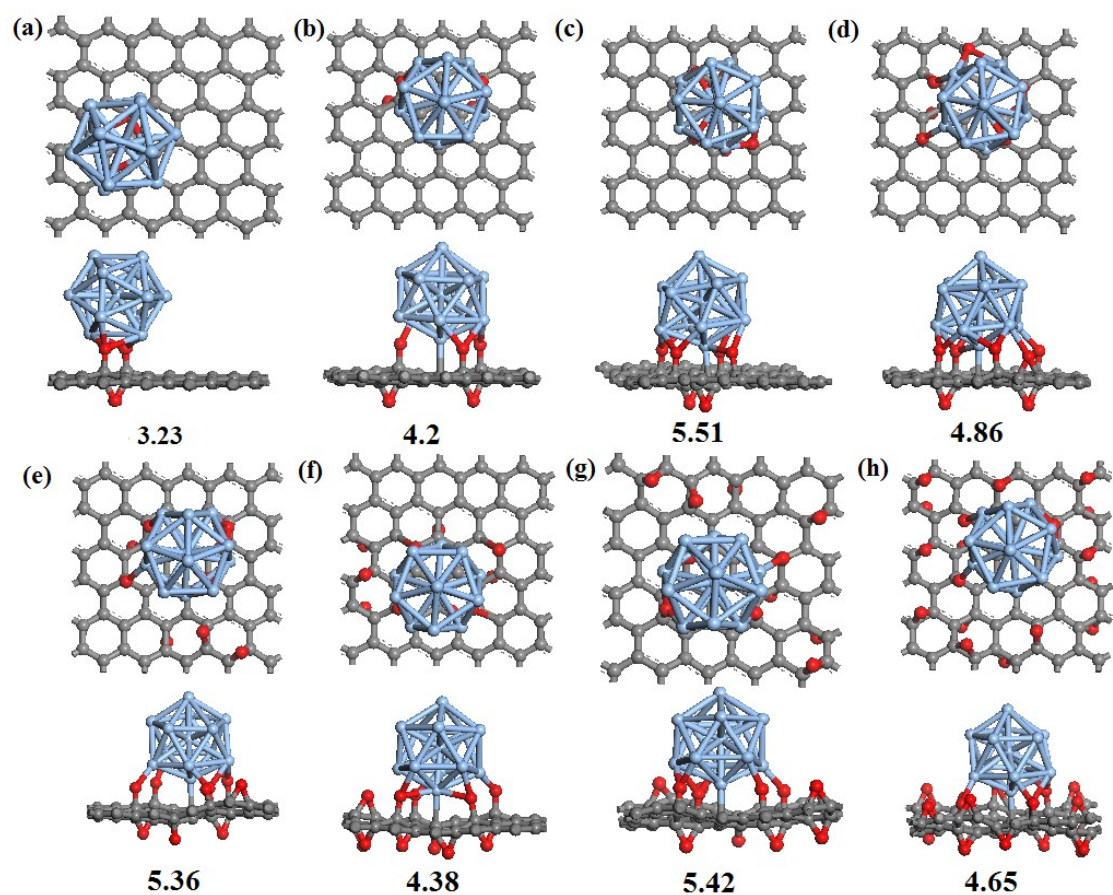

Figure S2. Top and side views of optimized structures and corresponding binding energies (in eV) for  $\text{Ag}_{13}$ /GOs with different oxidation level. (a) GO-30, (b) GO-50, (c) GO-60-2, (d) GO-70, (e) GO-90, (f) GO-120, and (h) GO-200.

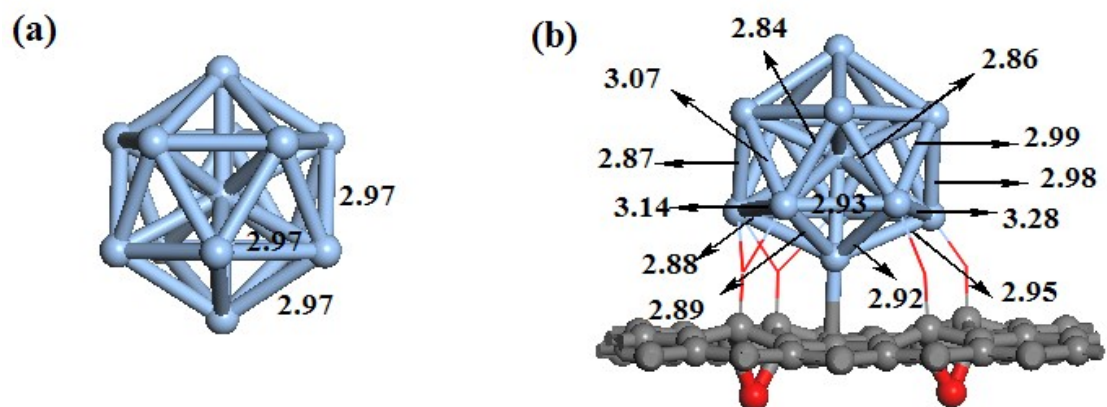

Figure S3. The changes in Ag–Ag bond length (in Å) of Ag<sub>13</sub> after deposition on GO-6O-1. The Ag–O and O–C bonds are shown with red solid line.

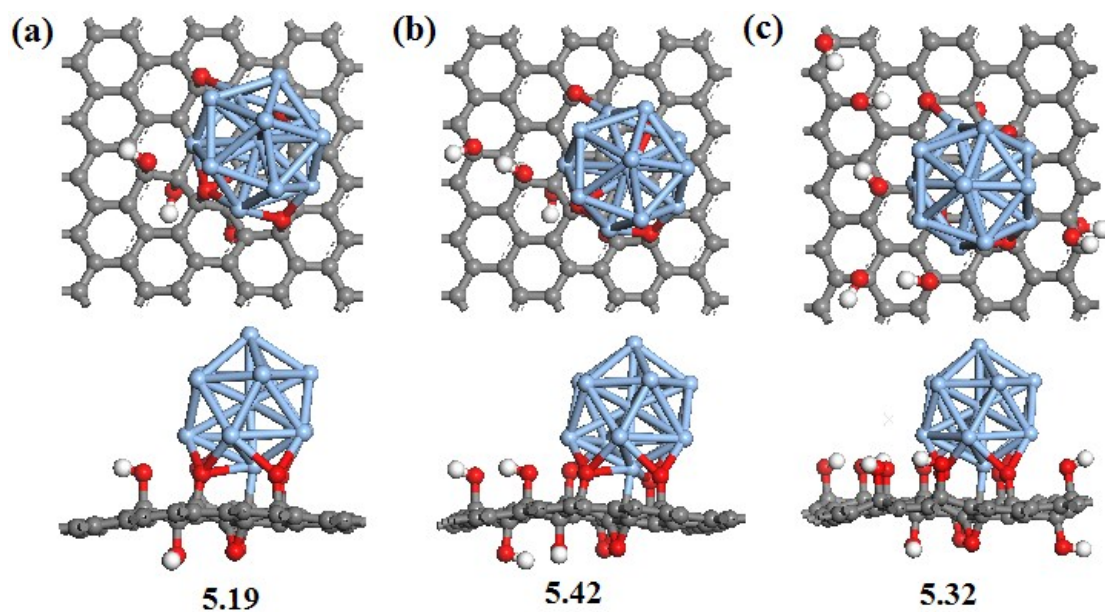

Figure S4. Top and side views of optimized structures and corresponding binding energies (in eV) for  $\text{Ag}_{13}$  deposited on GO-6O-1 with additional hydroxyl groups. (a) 2, (b) 4, and (c) 8 OH groups.

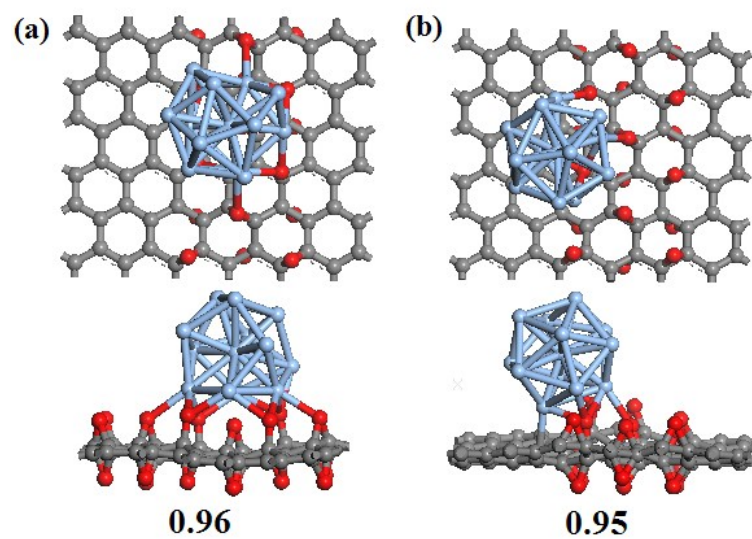

Figure S5. Top and side views of optimized structures and corresponding binding energies (in eV) for Ag<sub>13</sub>/GO3 with two binding models.

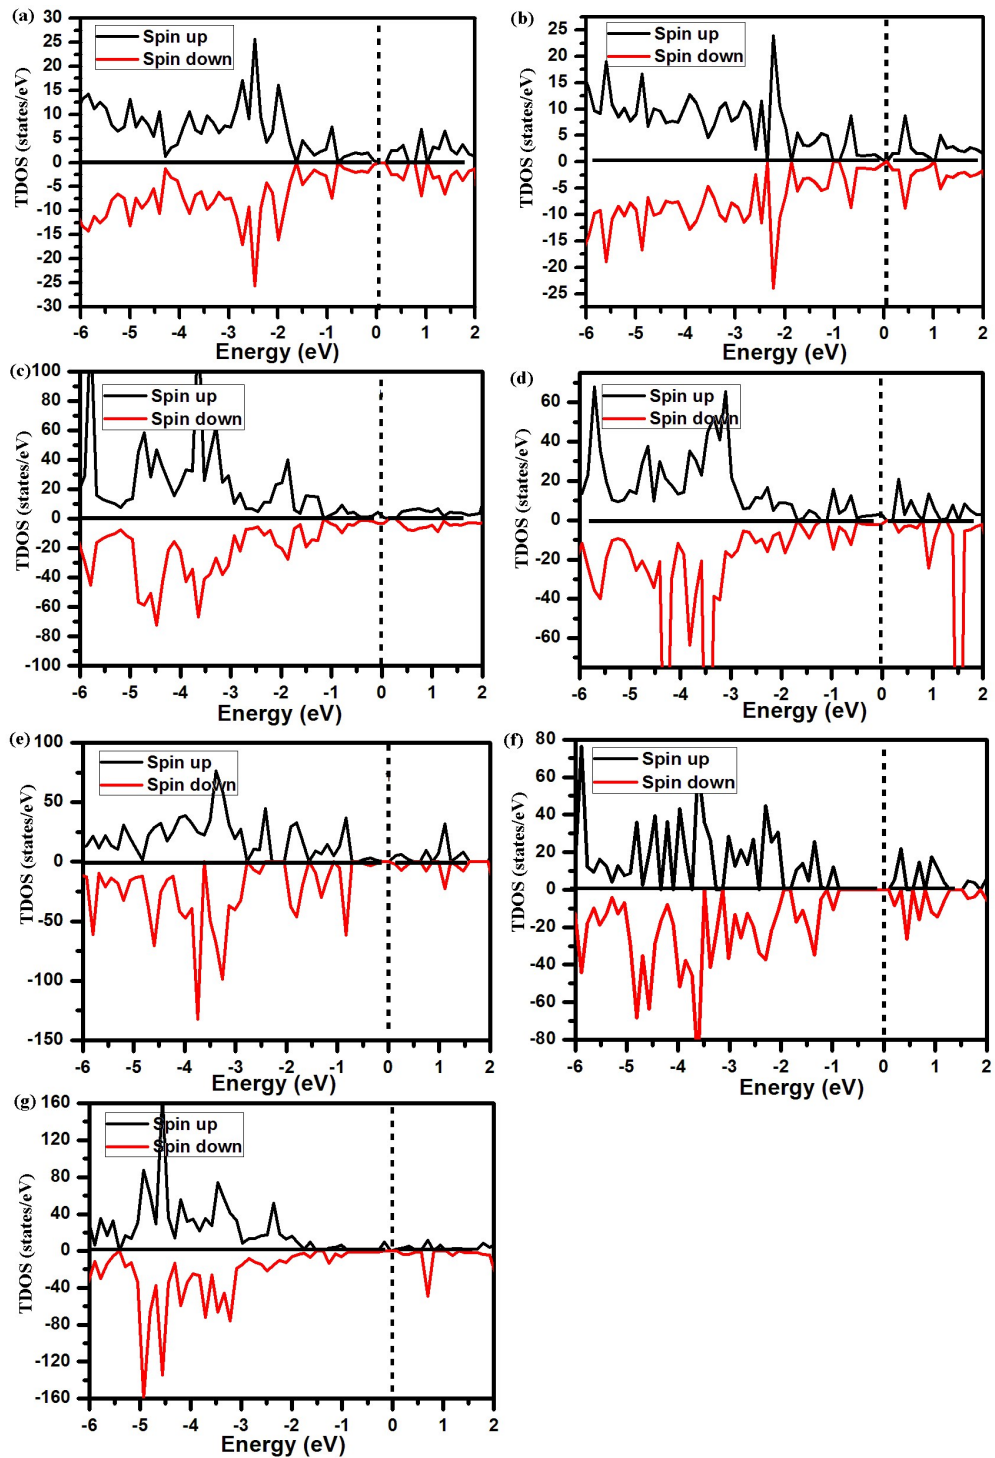

Figure S6. The spin-polarized TDOS of GOs and Ag<sub>13</sub>-GOs hybrid with different oxygen concentration. (a) GO-6O-1, (b) GO-6O-2, (c) Ag<sub>13</sub>/GO-6O-1, (d) Ag<sub>13</sub>/GO-6O-2, (e) Ag<sub>13</sub>/GO-14O-1, (f) Ag<sub>13</sub>/GO-17O, and (g) Ag<sub>13</sub>/GO<sub>2</sub>. The Fermi level is set to 0.

Table S1. Summary of calculated results for NH<sub>3</sub> and NO adsorptions on selected GOs models: the adsorption energy ( $E_{ad}$ ), the distance between adsorbate and binding site of GOs ( $d$ ), and the charge transfers from the molecule to GOs ( $\Delta Q$ ).

| substrate | adsorbate       | binding site* | $E_{ad}$ (eV) | $d$ (Å) | $\Delta Q$ (e) |
|-----------|-----------------|---------------|---------------|---------|----------------|
| GO-6O-1   | NH <sub>3</sub> | O             | -0.13         | 2.49    | 0.04           |
|           | NO              | No            | -0.15         | 2.61    | 0.17           |
| GO-14O-1  | NH <sub>3</sub> | O             | -0.18         | 2.43    | 0.06           |
| GO-5O-2OH | NH <sub>3</sub> | H from OH     | -0.56         | 1.76    | 0.09           |
|           | NH <sub>3</sub> | O from OH     | -0.15         | 2.33    | 0.01           |
|           | NO              | H from OH     | -0.12         | 2.51    | 0.12           |

\* Selected geometrical structures are shown in Figure S7.

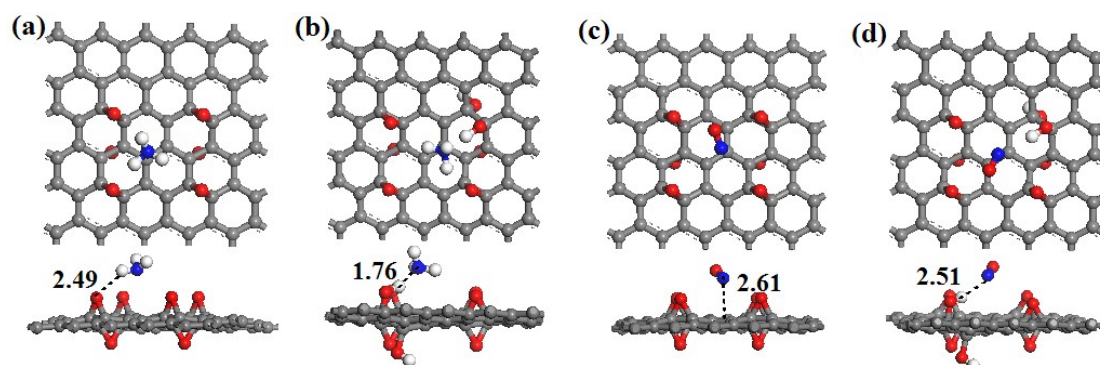

Figure S7. Top and side view of geometrical structures (distance in Å) for adsorption of NH<sub>3</sub> and NO on pristine GOs. (a, c) GO-6O-1 and (b, d) GO-5O-2OH.



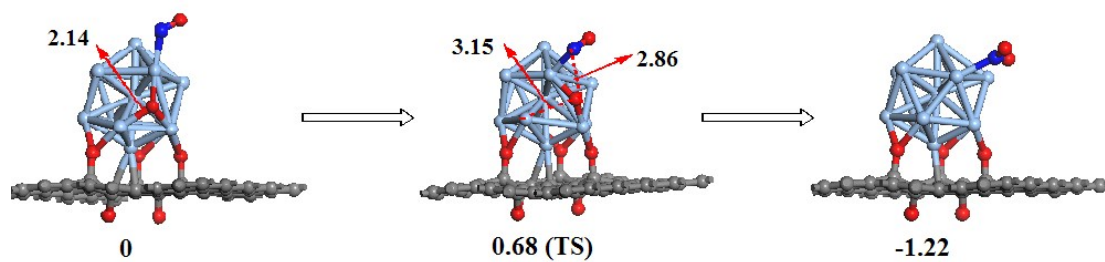

Figure S8. The geometrical structures (distance in Å) of initial state, transition state (TS), and final state for oxidation of adsorbed NO to NO<sub>2</sub> on Ag<sub>13</sub>O/GO-50. All energies (in eV) are relative to initial state.

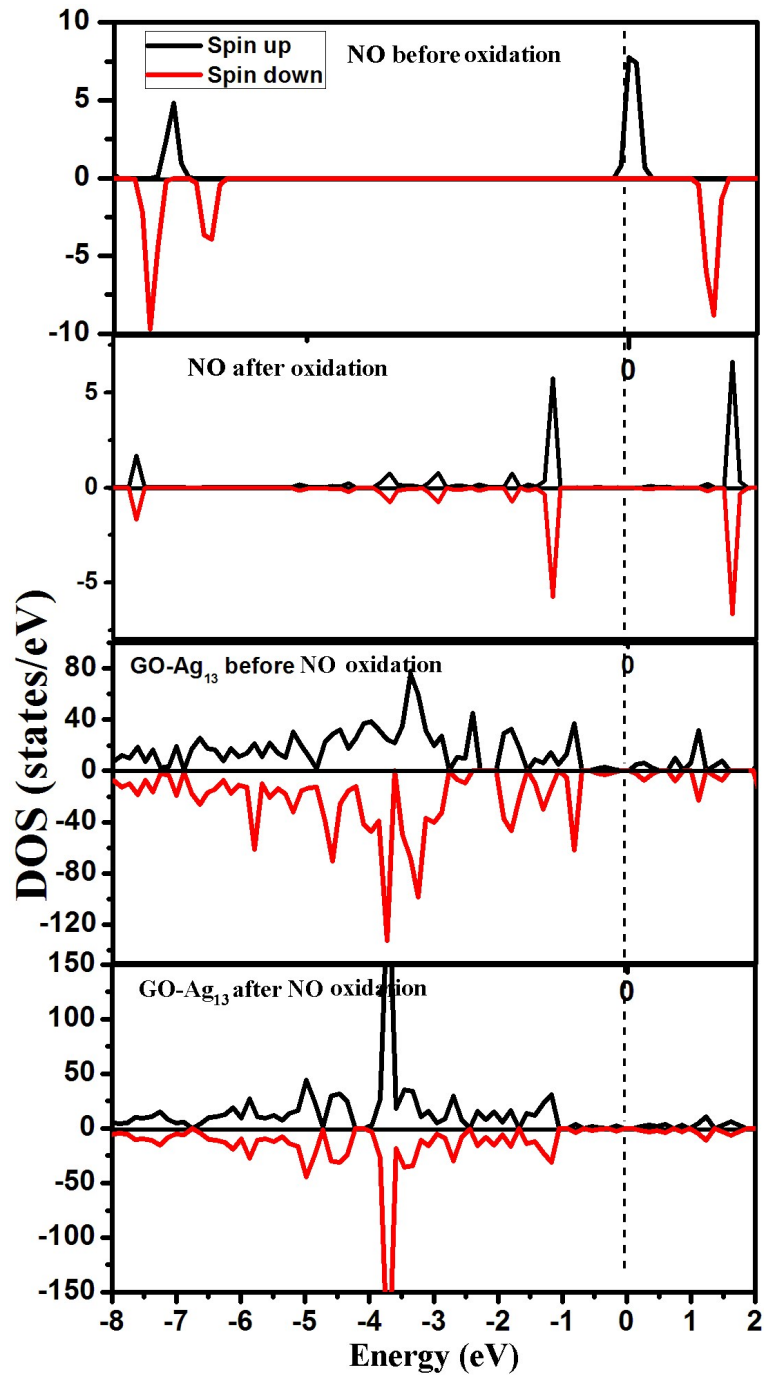

Figure S9. The spin-polarized TDOS and PDOS of NO and Ag<sub>13</sub>/GO-14O-1 before and after NO oxidation on hybrid. The Fermi level is set 0.
